# Supplementary material for: Large-scale phosphoproteome analysis in seedling leaves of Brachypodium distachyon L
Source: PubMed Central journal article supplement (PMC4079959; doi:10.1186/1471-2164-15-375), 2014-05-16

Figure S1

A

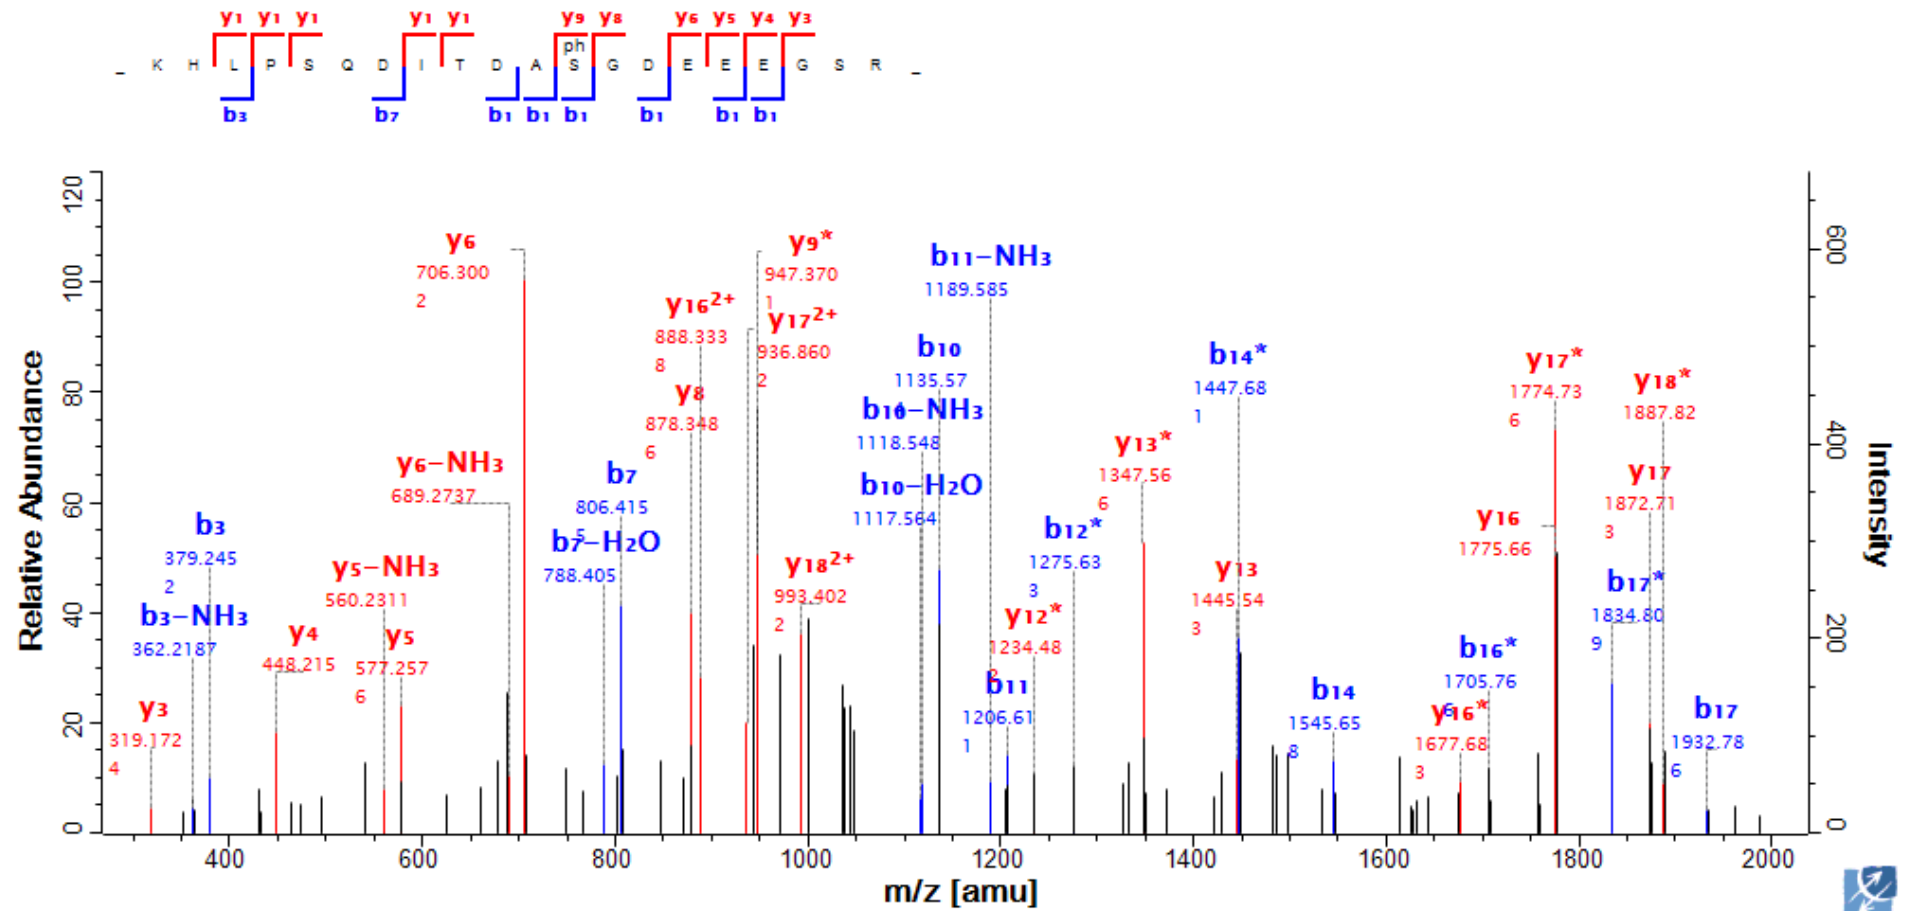

B

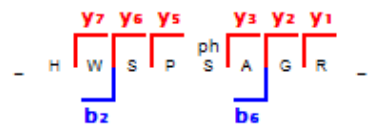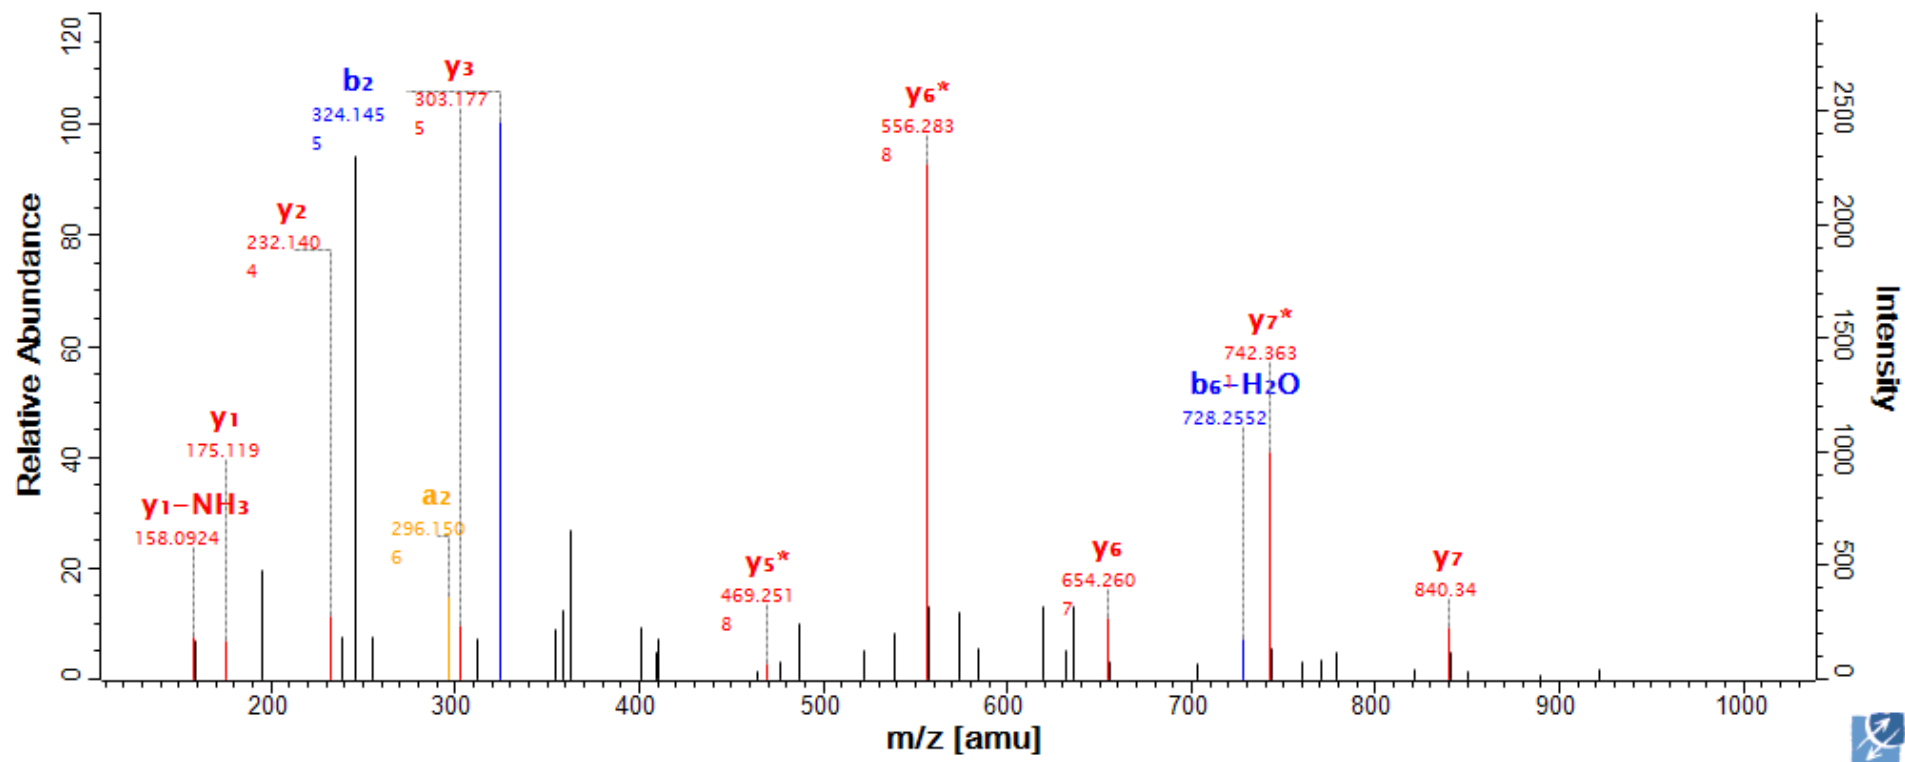

C

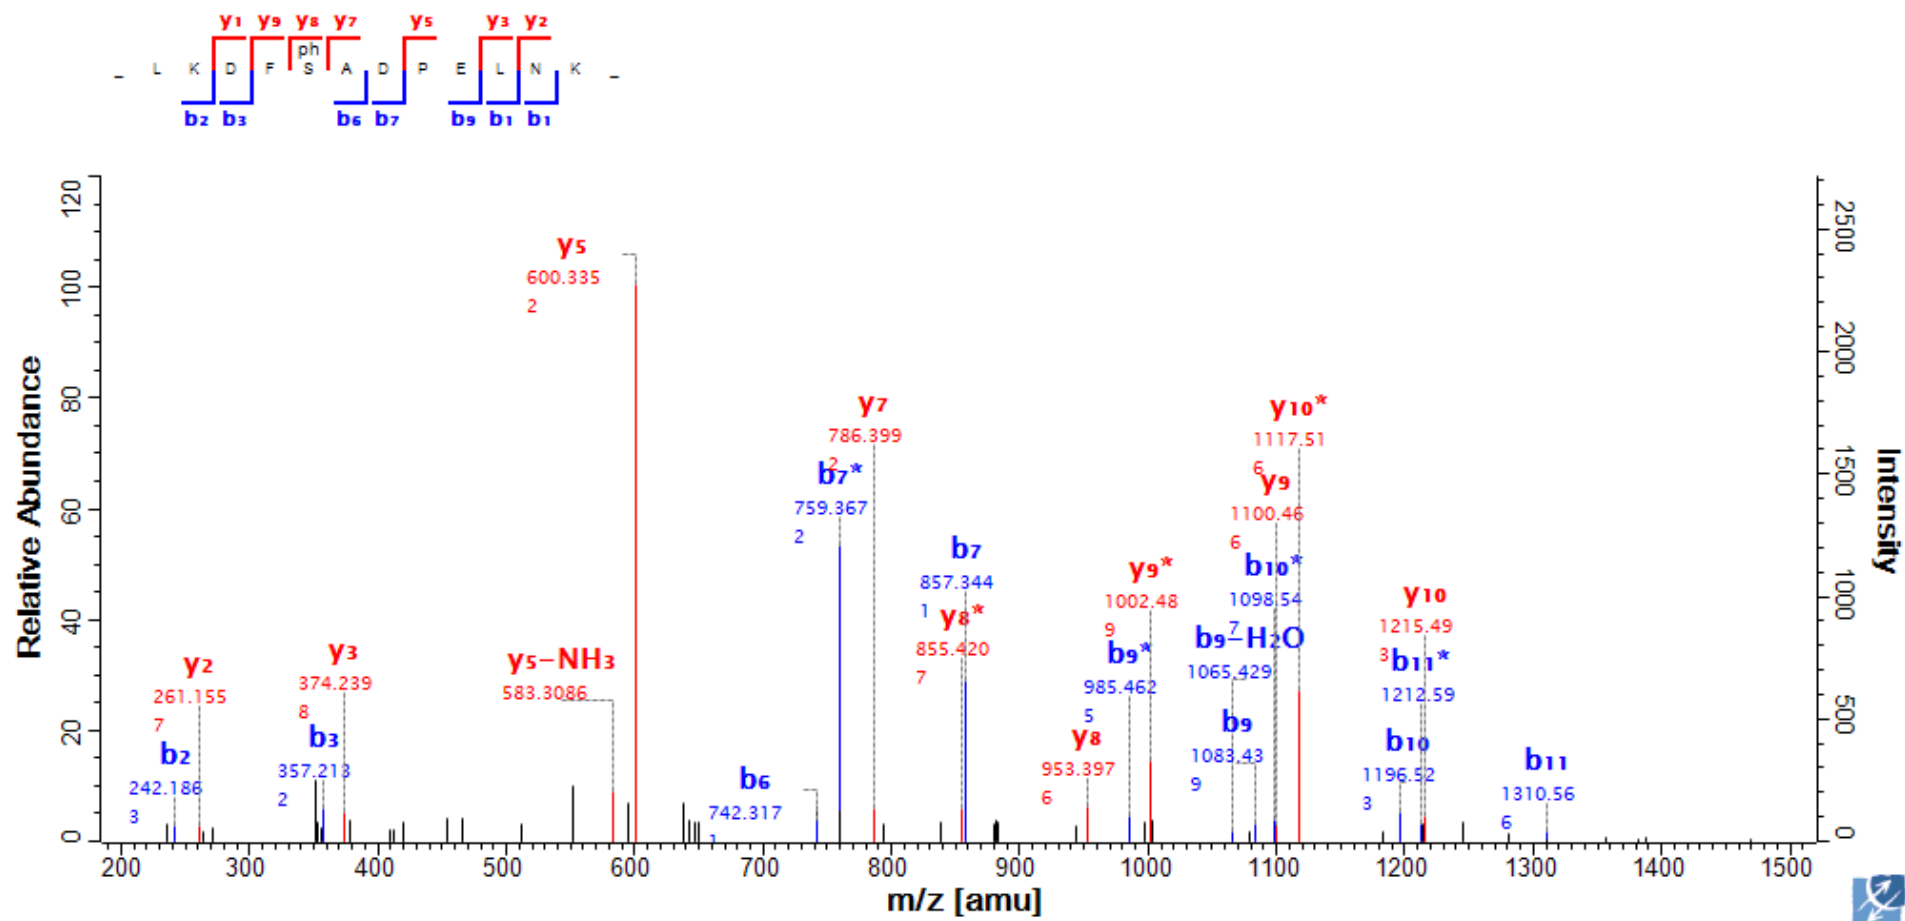

D

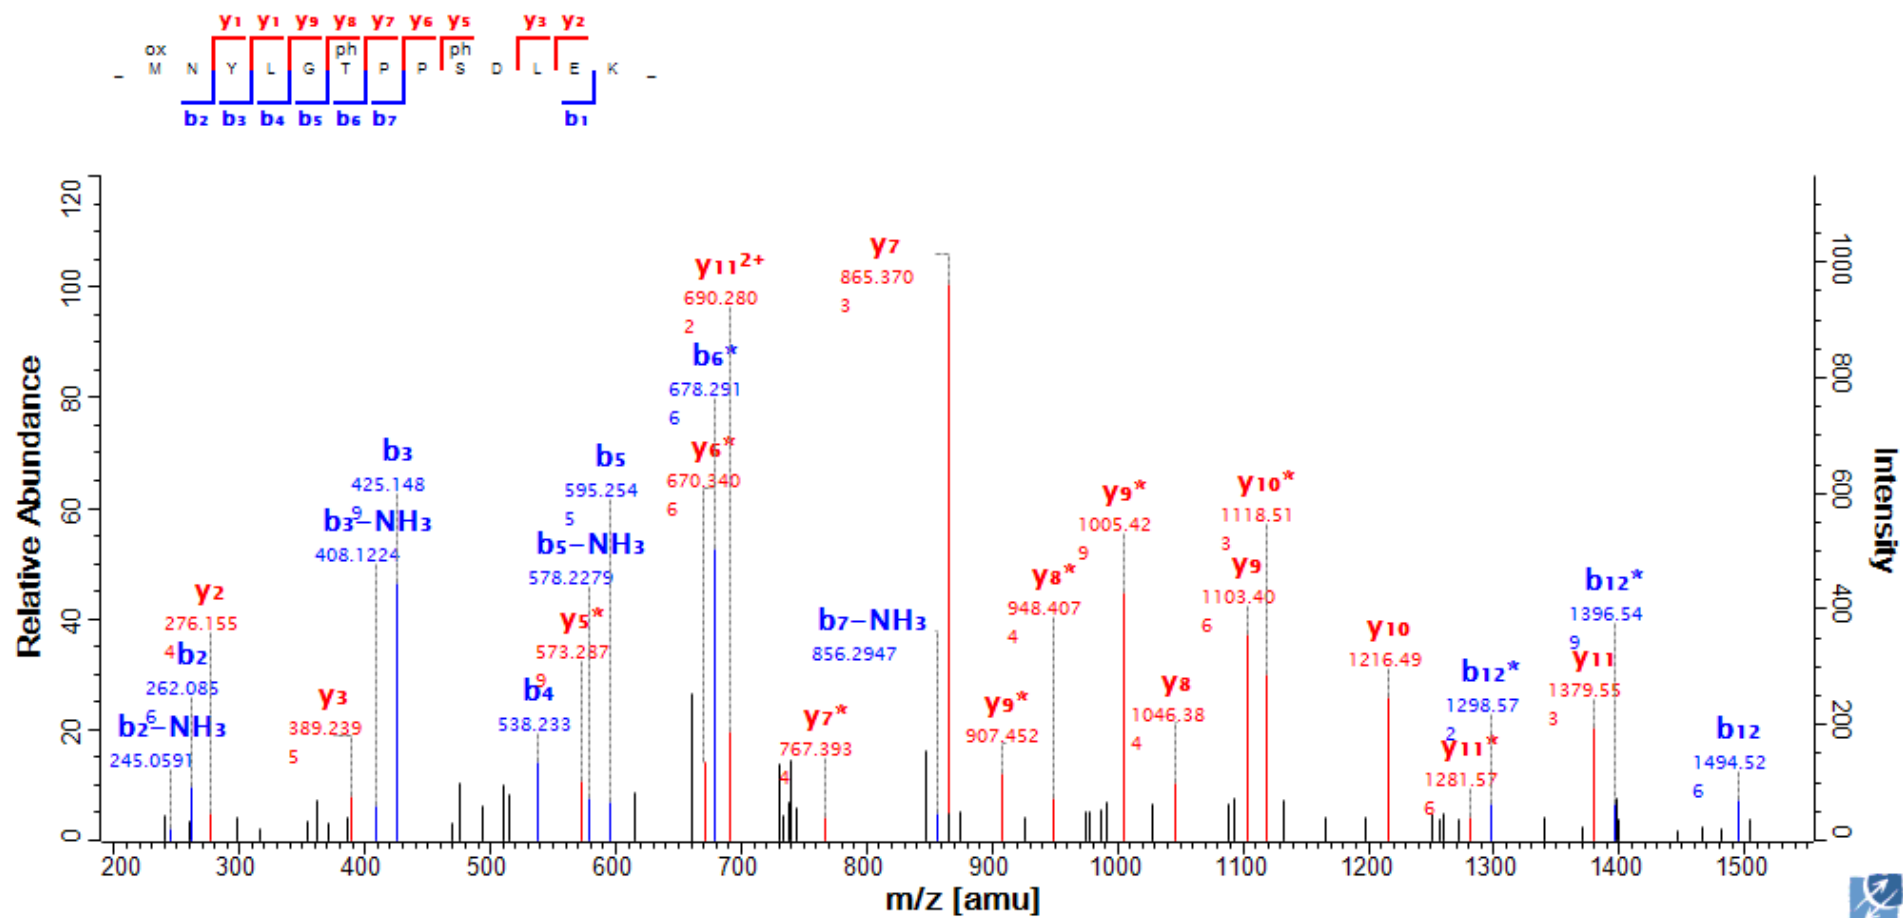

F

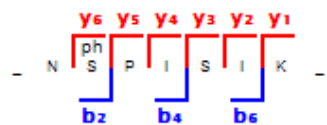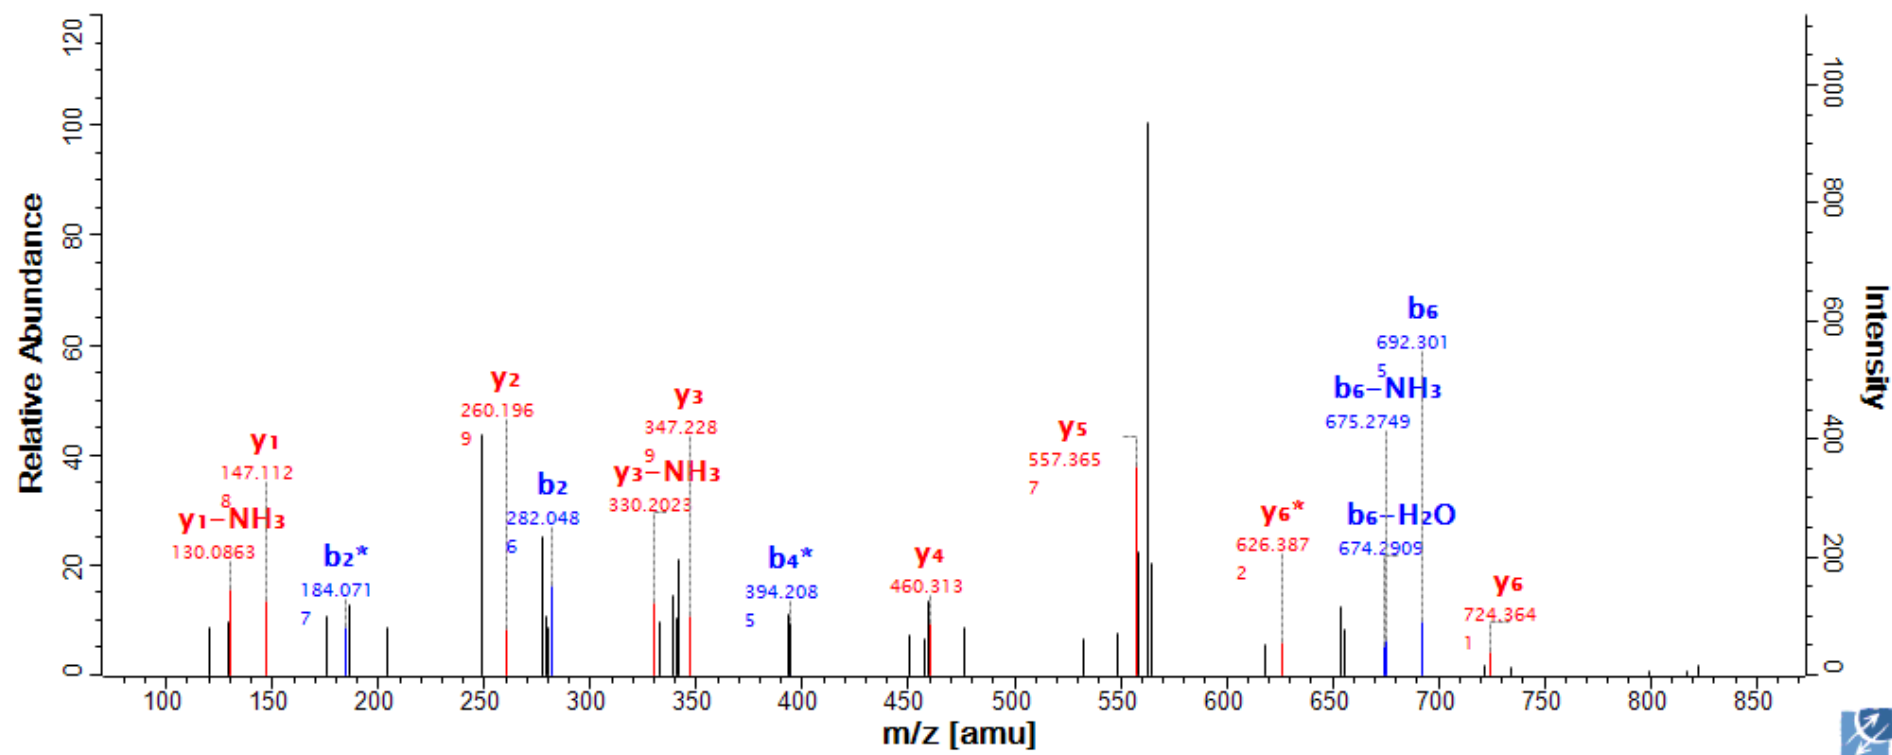

F

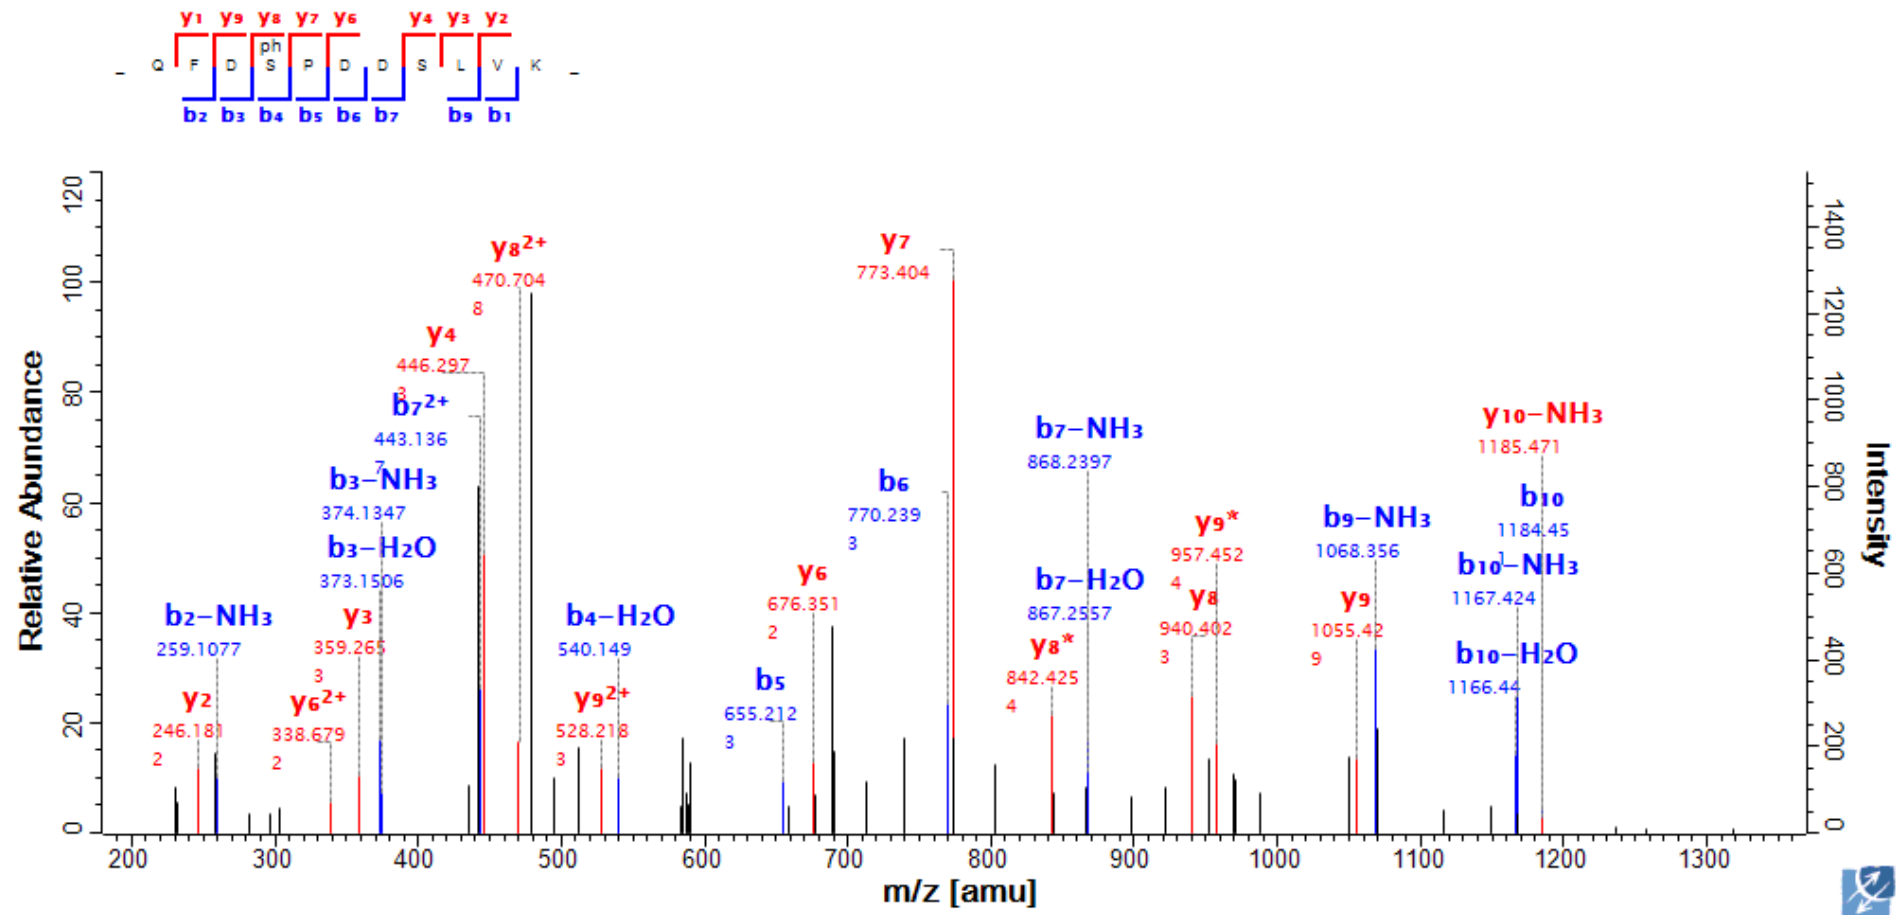

G

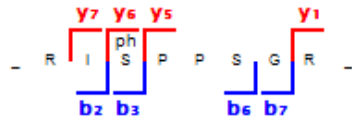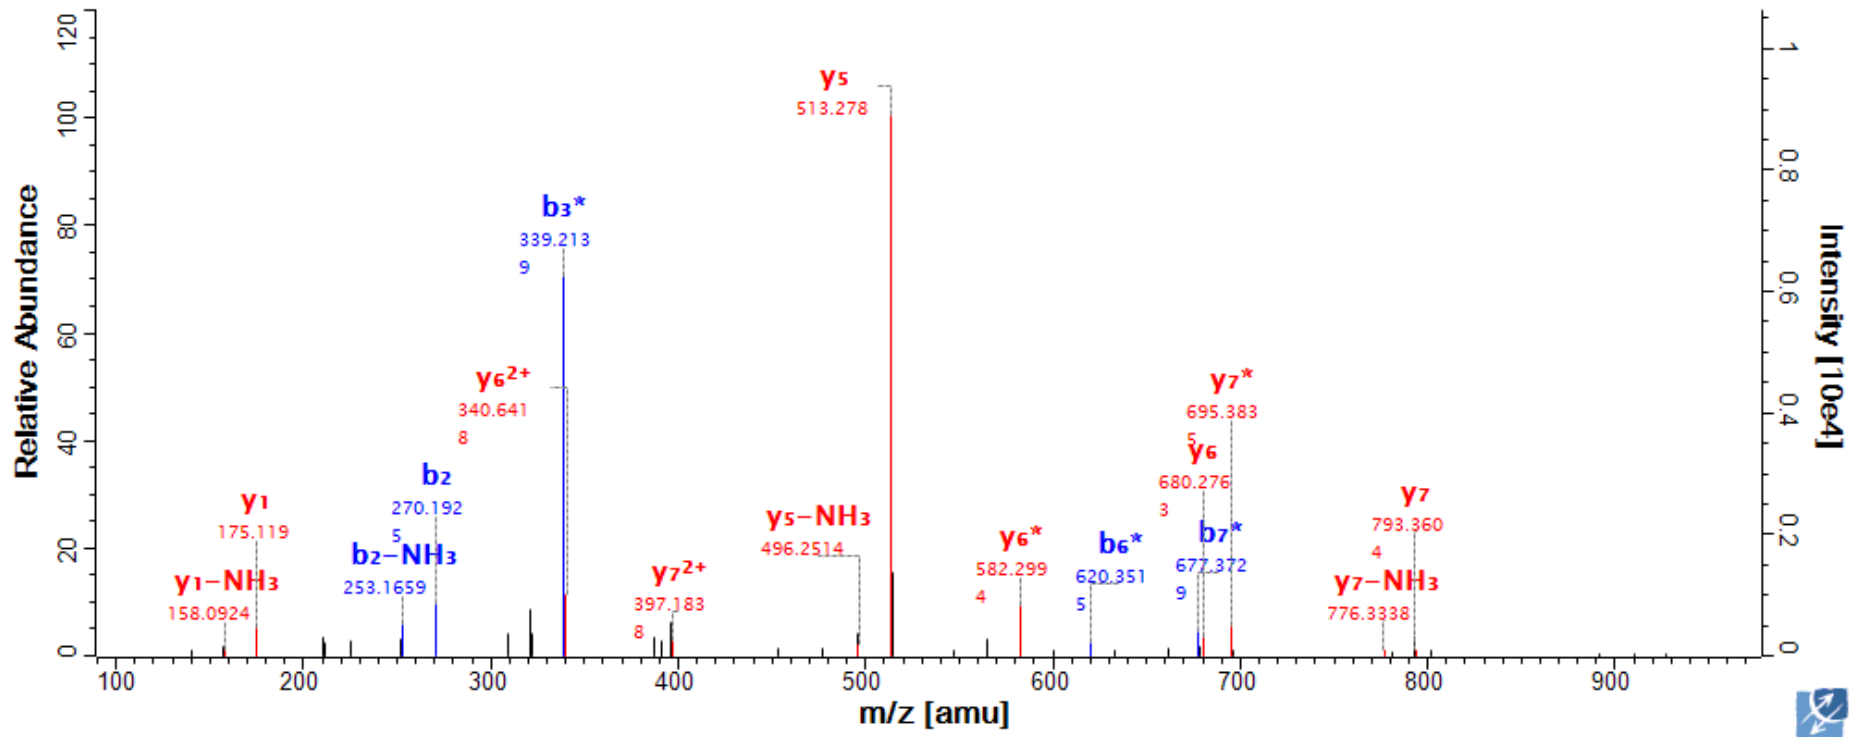

Supplement: 12864_2014_6177_MOESM2_ESM.pdf [file 12864_2014_6177_MOESM2_ESM.pdf]
